# Supplementary material
Source: Springer Nature journal article supplement (https://www.springermedizin.de/resource/supplementary/12889_2008_1193_MOESM1_ESM.pdf/9502658)
Supplement: MOESM1 [file 9502658]

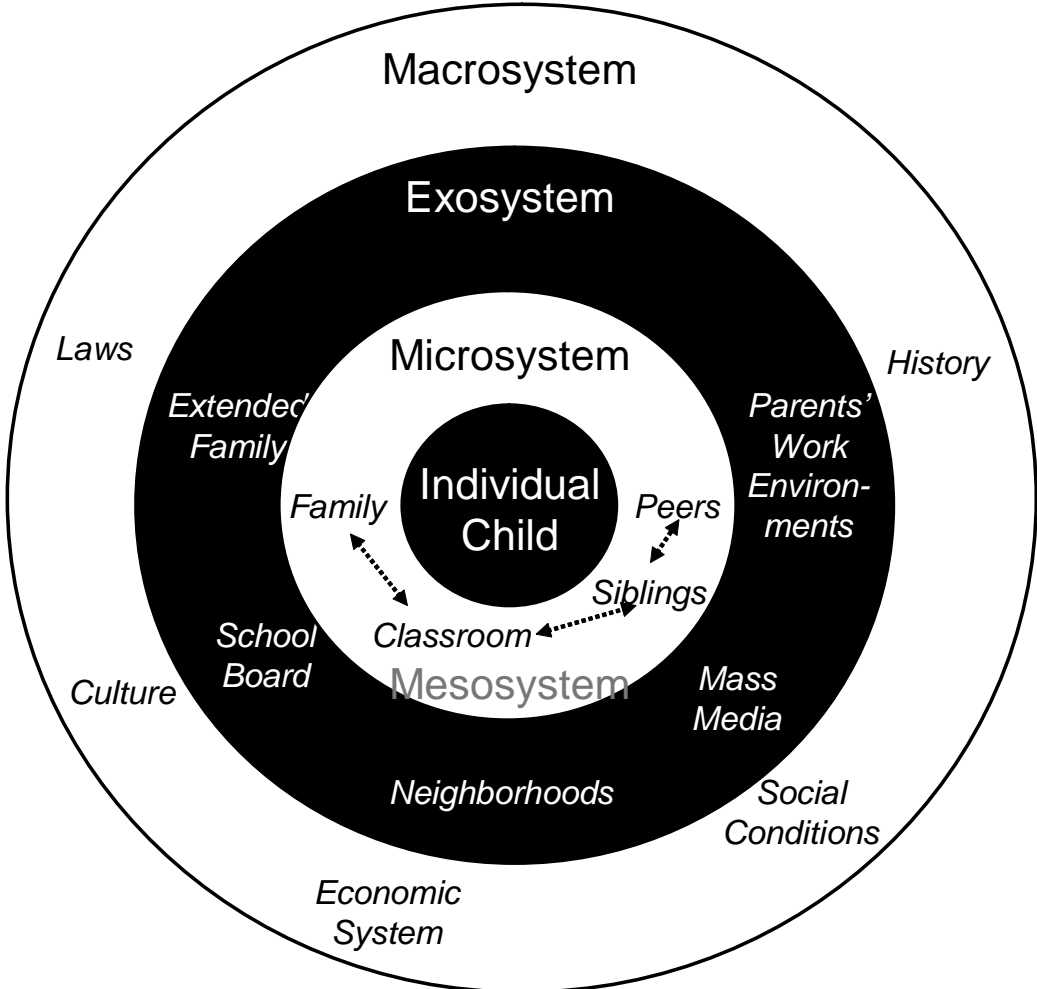

Macrosystem

Exosystem

Microsystem

Individual Child

Mesosystem

*Laws*

*History*

*Extended Family*

*Parents' Work Environments*

*Family*

*Peers*

*Siblings*

*School Board*

*Classroom*

*Mass Media*

*Culture*

*Neighborhoods*

*Social Conditions*

*Economic System*
